# Supplementary material
Source: HighWire-hosted journal article supplement (https://jnm.snmjournals.org/highwire/filestream/95350/field_highwire_adjunct_files/0/207308_Supplemental_Data.pdf)
Supplement: 207308_Supplemental_Data.pdf [file 207308_Supplemental_Data.pdf]

## Derivation of G-factor used in Table 2

Generalized Linear-Quadratic model (GLQM) for an arbitrary dose-rate function has been described by (1)

$$\ln SF(T) = -\alpha D_T(T) - 2\beta \int_0^T dt \dot{D}(t) \int_0^t \dot{D}(\omega) R(t-\omega) d\omega, \quad (S1)$$

where  $\alpha$  and  $\beta$  are the intrinsic radiosensitivity parameters,  $D_T$  is the total physical dose accumulated up to time  $T$ ,  $\dot{D}(t)$  is the dose-rate function and  $R(t)$  is the repair function of sublethal damage.  $R(t)$  has commonly been treated as behaving exponentially, i.e.  $R(t) = e^{-\mu t}$ , which assumes the repair rate is constant up to time  $T$  with  $\mu$  as the repair constant, in the literature (2). Based on this generalized model, Lea-Catcheside factor,  $G$ , is then defined as the ratio of the second term in Eq.(S1) with repair to the same term without repair

$$G = \frac{\int_0^T dt \dot{D}(t) \int_0^t \dot{D}(\omega) R(t-\omega) d\omega}{\int_0^T dt \dot{D}(t) \int_0^t \dot{D}(\omega) d\omega}. \quad (S2)$$

Since trapezoidal integration is used to assess the cumulative activity reported in Table 2, the activity function assumed is

$$\begin{aligned} A(t) &= m_1 t, t \leq 1 \\ &= m_1 + m_2 t, 1 < t \leq 24 \end{aligned} \quad (S3)$$

where  $t$  is the time (in hour),  $m_1$  and  $m_2$  are the slopes connecting from  $t = 0$  to  $t = 1$  and from  $t = 1$  to  $t = 24$ , respectively. The dose-rate function is then defined as

$$\dot{D}(t) = A(t) \times S \quad (S4)$$

where  $S$  is the simulated  $S$ -value. Therefore, the  $G$ -factor after 1 hour is

$$\begin{aligned}
G &= \frac{S^2 \int_0^1 dt m_1 t \int_0^t m_1 \omega e^{-\mu(t-\omega)} d\omega}{\frac{1}{2} S^2 \left(\frac{1}{2} m_1\right)^2} \\
&= 8 \times \int_0^1 t \left( \frac{ut + e^{-ut} - 1}{u^2} \right) dt \\
&= 8 \times \left( \frac{6 - 3\mu^2 + 2\mu^3 - 6(1+\mu)e^{-\mu}}{6\mu^4} \right), \tag{S5}
\end{aligned}$$

which is a function dependent only on the repair constant  $\mu$  where  $\mu$  is the reciprocal of repair half-time,  $T_{rep}$  times  $\ln 2$ .  $T_{rep}$  is assumed to be 1.5 hour for Table 2 (3, 4) and thus  $G = 0.89$ .

Similarly, the  $G$ -factor after 24 hours can be derived.

$$\begin{aligned}
G &= \frac{S^2 \left( \int_0^1 dt m_1 t \int_0^t m_1 \omega e^{-\mu(t-\omega)} d\omega + \int_1^{24} dt (m_1 + m_2 t) \int_0^t (m_1 + m_2 \omega) e^{-\mu(t-\omega)} d\omega \right)}{\frac{1}{2} S^2 \left[ \frac{1}{2} m_1 + 23m_1 + \frac{23}{2} m_2 \right]^2} \\
&= \frac{2}{\left[ \frac{1}{2} m_1 + 23m_1 + \frac{23}{2} m_2 \right]^2} \times \left[ m_1^2 \left( \frac{6 - 3\mu^2 + 2\mu^3 - 6(1+\mu)e^{-\mu}}{6\mu^4} \right) + K \right] \tag{S6}
\end{aligned}$$

where  $K$  is

$$\begin{aligned}
K &= \int_1^{24} (m_1 + m_2 t) \left[ \left( \frac{m_1 - m_1 e^{-\mu t}}{\mu} \right) + m_2 \left( \frac{\mu t + e^{-\mu t} - 1}{\mu^2} \right) \right] dt \\
&= \frac{1}{6\mu^4} \times \left[ -6e^{-24\mu} (m_2 - m_1 \mu) (m_2 + m_1 \mu + 24m_2 \mu) + 6e^{-\mu} (m_2 - m_1 \mu) (m_2 + \right. \\
&\quad \left. (m_1 + m_2) \mu) + 23\mu^2 (6m_1^2 \mu + 6m_1 m_2 (25\mu - 1) + m_2^2 (1202\mu - 75)) \right]. \tag{S7}
\end{aligned}$$

Then one can easily calculate  $G$ -factor for different cell compartments, which have different uptake behavior, of each cell line based on empirical internalization data.  $G$ -factors after 24 hours for the cell lines studied in this work have been compiled in Supplemental Table 3.



## REFERENCES

1. Millar WT. Application of the linear-quadratic model with incomplete repair to radionuclide directed therapy. *Br J Radiol.* 1991;64:242-251.
2. Strigari L, Benassi M, Chiesa C, Cremonesi M, Bodei L, D'Andrea M. Dosimetry in nuclear medicine therapy: radiobiology application and results. *Q J Nucl Med Mol Imaging.* 2011;55:205-221.
3. Thames HD, Withers HR, Peters LJ. Tissue repair capacity and repair kinetics deduced from multifractionated or continuous irradiation regimens with incomplete repair. *Br J Cancer Suppl.* 1984;6:263-269.
4. Vegesna V, Withers HR, Thames HD, Jr., Mason K. Multifraction radiation response of mouse lung. *Int J Radiat Biol Relat Stud Phys Chem Med.* 1985;47:413-422.

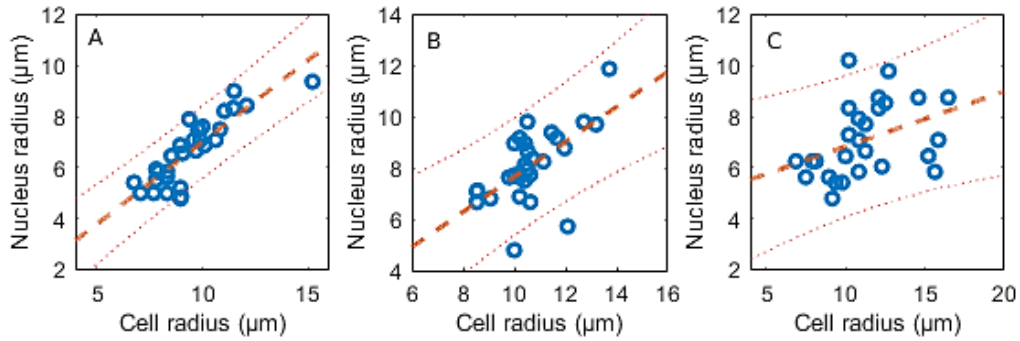

**Supplemental Figure 1.** Experimental distribution of cell and nucleus radii for (A) MDA-MB-468, (B) SQ20B and (C) 231-H2N cell lines. The linear fit to the data (dashed line) and the 95% confidence intervals (dotted lines) of each given dataset are shown.

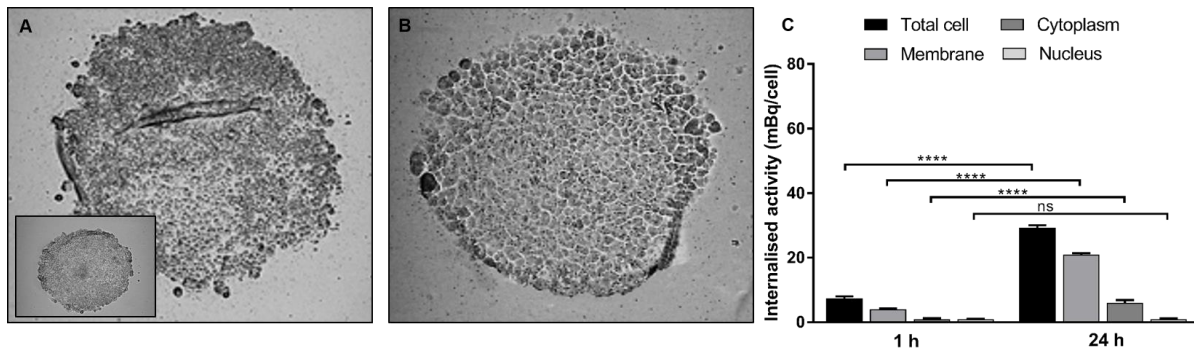

**Supplemental Figure 2.** Spatial distribution of  $^{111}\text{In}$ -EGF in 231-H2N spheroids, showing microautoradiograms of 8  $\mu\text{m}$  spheroid sections after (A) 1 h (insert shows control) and (B) 24 h treatment. (C) Internalized activity (mBq/cell) determined at 1 and 24 h incubation. \* $P < 0.05$ , ns = not significant.

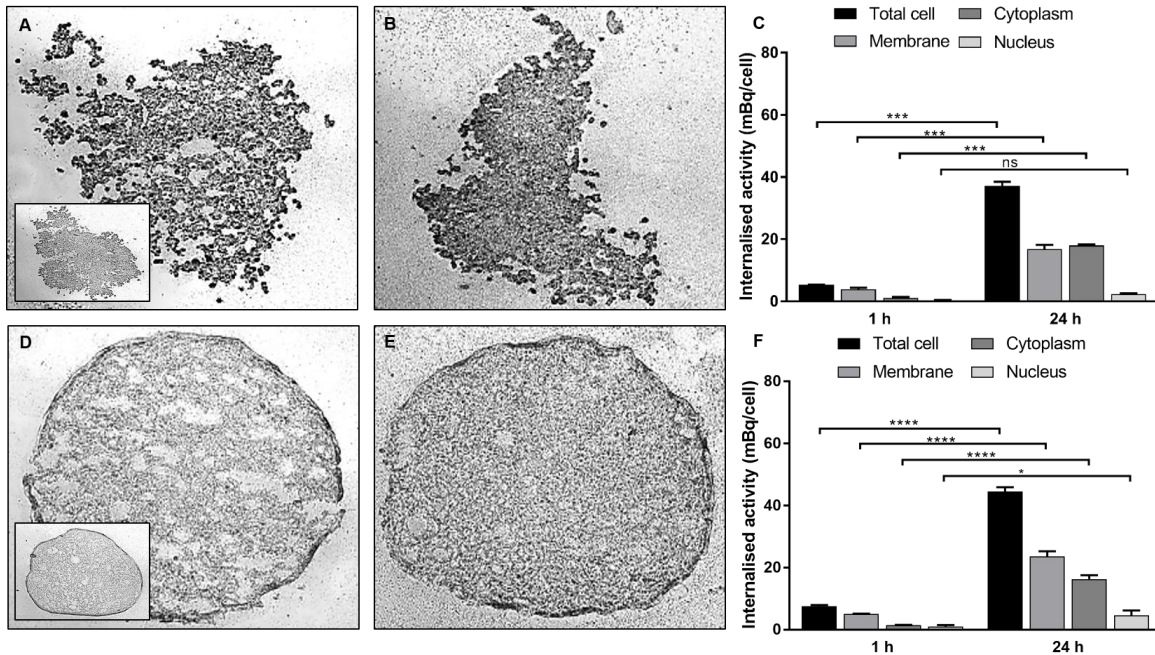

**Supplemental Figure 3.** Spatial distribution of  $^{111}\text{In-Tz}$  in MDA-MB-468 and SQ20B spheroids, showing microautoradiograms of 8  $\mu\text{m}$  spheroid sections after (A and D) 1 h (insert shows control) and (B and E) 24 h treatment. (C and F) Internalized activity (mBq/cell) determined at 1 and 24 h incubation.

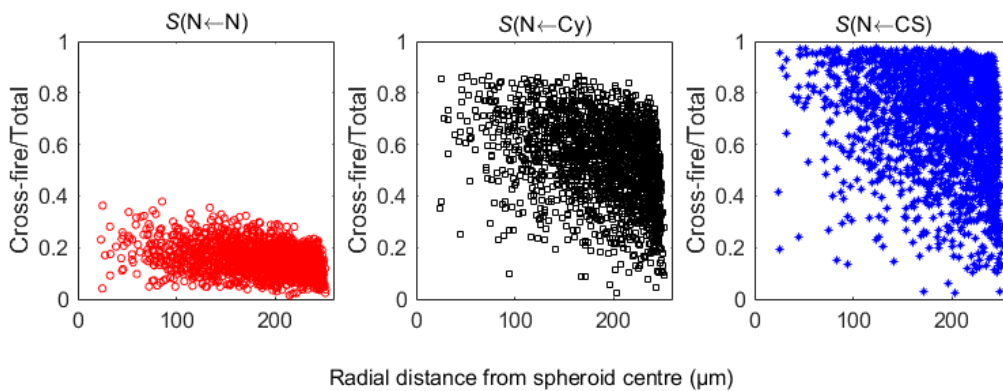

**Supplemental Figure 4.** The contribution of dose deposited by other cells (cross dose) to the total dose (self-dose plus cross dose) as a function of radial distance to the spheroid center for radioactive sources originating from the nucleus, cytoplasm and cell surface in the 231-H2N cell line.

### Supplemental Table 1

Ratio of cross dose to total dose for different source locations.

|                | Cross dose to total dose ratio for cells in cluster – RCP |               |               |
|----------------|-----------------------------------------------------------|---------------|---------------|
|                | S(N←N)                                                    | S(N←Cy)       | S(N←Cs)       |
| <b>MDA-468</b> | 0.168 ± 0.059                                             | 0.519 ± 0.126 | 0.643 ± 0.153 |
| <b>SQ20B</b>   | 0.200 ± 0.069                                             | 0.542 ± 0.132 | 0.657 ± 0.151 |
| <b>231-H2N</b> | 0.151 ± 0.055                                             | 0.542 ± 0.158 | 0.697 ± 0.204 |

### Supplemental Table 2

G-factor after 24 h for different compartments of each cell line. Average values were used in the calculations.

|                       |            | Membrane | Cytoplasm | Nucleus | Average |
|-----------------------|------------|----------|-----------|---------|---------|
| <sup>111</sup> In-EGF | MDA-MB-468 | 0.180    | 0.176     | 0.172   | 0.176   |
|                       | SQ20B      | 0.171    | 0.214     | 0.167   | 0.184   |
|                       | 231-H2N    | 0.209    | 0.203     | 0.182   | 0.198   |
| <sup>111</sup> In-Tz  | MDA-MB-468 | 0.188    | 0.221     | 0.206   | 0.205   |
|                       | SQ20B      | 0.190    | 0.214     | 0.199   | 0.201   |
|                       | 231-H2N    | 0.193    | 0.186     | 0.168   | 0.182   |
